# Supplementary material for: Multi-scale magnetic coupling of Fe@SiO2@C–Ni yolk@triple-shell microspheres for broadband microwave absorption
Source: Royal Society of Chemistry journal article supplement (doi:10.1039/c9nr06629b), 2019-01-01
Supplement: c9nr06629b1.pdf [file c9nr06629b1.pdf]

## Multi-scale magnetic coupling of Fe@SiO<sub>2</sub>@C-Ni yolk@triple-shell microsphere for broadband microwave absorption

Xiaofeng Shi, Wenbin You, Yunhao Zhao, Xiao Li, Zhengzhong Shao and Renchao Che\*

Laboratory of Advanced Materials, Department of Materials Science and Collaborative Innovation Center of  
Chemistry for Energy Materials (iChem), Fudan University, Shanghai 200438, P. R. China

\* E-mail: [rcche@fudan.edu.cn](mailto:rcche@fudan.edu.cn)

### S1: The details of conventional electromagnetic measurements

The as-prepared Fe@SiO<sub>2</sub>@C-Ni samples were mixed homogeneously with the wax in a mass ratio of 7:3. The mixture was compressed into a columnar ring of 7.00 mm outer diameter and 3.00 mm inner diameter. The complex relative permittivity and permeability were measured by an N5230C vector network analyzer in the 2-18 GHz range.

### S2: More discussion about Electron holography

Off-axis electron holography is an outstanding technique that can obtain the quantitative information on the electrostatic and magnetic field of the measured sample under nano-scale resolution. The phase information is presented in one dimension without regard to dynamical diffraction effects by

$$\phi(x) = \left(\frac{2\pi}{\lambda}\right) \left(\frac{E + E_0}{E(E + 2E_0)}\right) \int V(x, z) dz - \left(\frac{e}{\hbar}\right) \times \iint B_{\perp}(x, z) dx dz$$

Where  $z$  is the incident beam direction,  $x$  is a direction in the plane of the sample,  $B_{\perp}$  is the magnetic induction perpendicular to the  $x$  and  $z$ ,  $V$  is the mean inner potential,  $\lambda$  is the wavelength,  $E$  and  $E_0$  are the kinetic and rest mass energies of the incident electron, respectively.

The plane electron wave pass through the sample, which carries the amplitude and phase information of sample.

In the process of experiment, from the Fourier transform of the hologram, the appropriate sideband position is

selected to carry out the inverse Fourier transform, and the amplitude and phase information are calculated. In

this paper, the electron holographic reconstruction map shows the stray magnetic field lines out of the magnetic

microsphere.

### **S3: The analysis of FTIR spectrum**

Fourier transform infrared (FT-IR) is employed to measure the compositions of the sample. The characteristic

peaks at  $1074\text{ cm}^{-1}$ ,  $943\text{ cm}^{-1}$ ,  $805\text{ cm}^{-1}$  and  $464\text{ cm}^{-1}$  correspond to the Si-O-Si, Si-O-H stretching vibrations and

bending vibration of O-Si-O, respectively, which shows the existence of  $\text{SiO}_2$ . Peaks at  $1283\text{--}1429\text{ cm}^{-1}$  are

attributed to C-OH stretching and O-H bending vibrations. The peak at  $1620\text{ cm}^{-1}$  is assigned to C=C vibrations,

which reflects the carbon species on the FSCN microsphere surface from carbonated PDA. No peaks are observed

at  $\sim 500\text{--}600\text{ cm}^{-1}$ , indicating the inexistence of Fe-O or Ni-O.

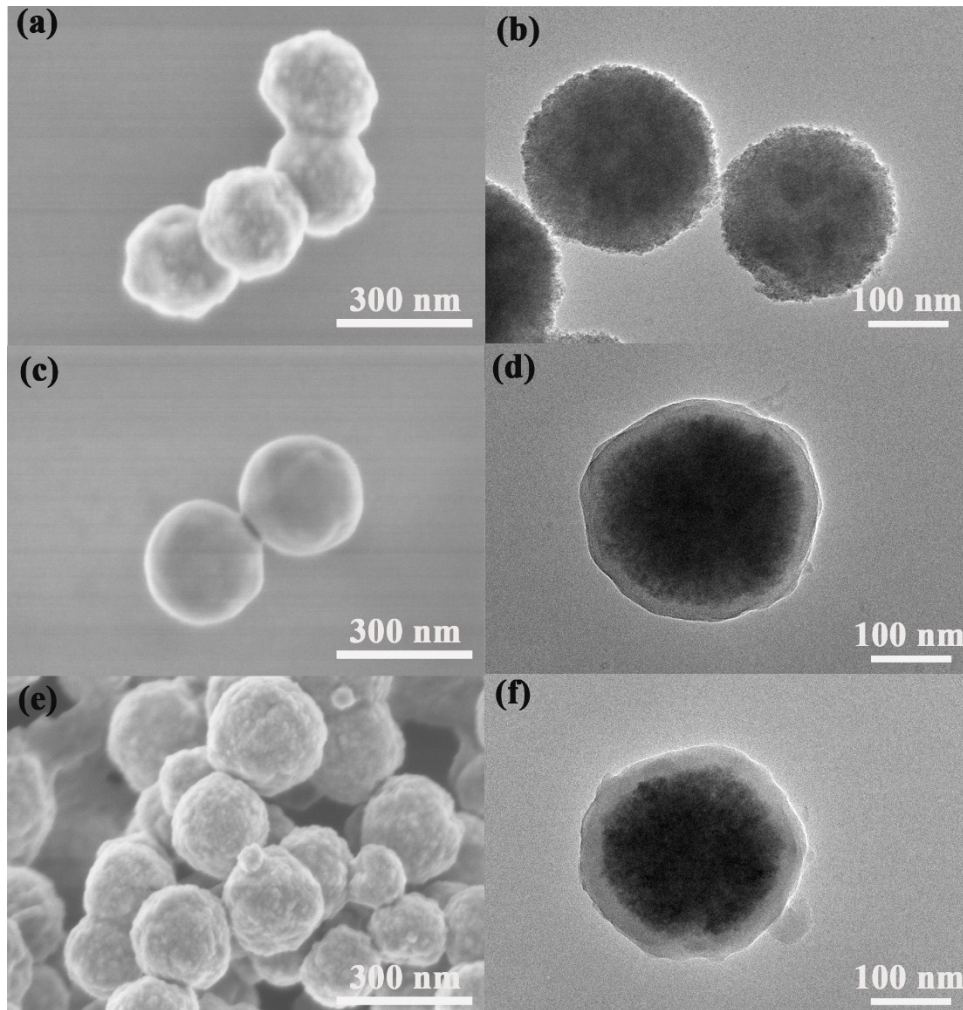

**Figure S1.** The SEM and TEM images of Fe<sub>3</sub>O<sub>4</sub>, Fe<sub>3</sub>O<sub>4</sub>@SiO<sub>2</sub> and Fe<sub>3</sub>O<sub>4</sub>@SiO<sub>2</sub>@PDA-Ni<sup>2+</sup>

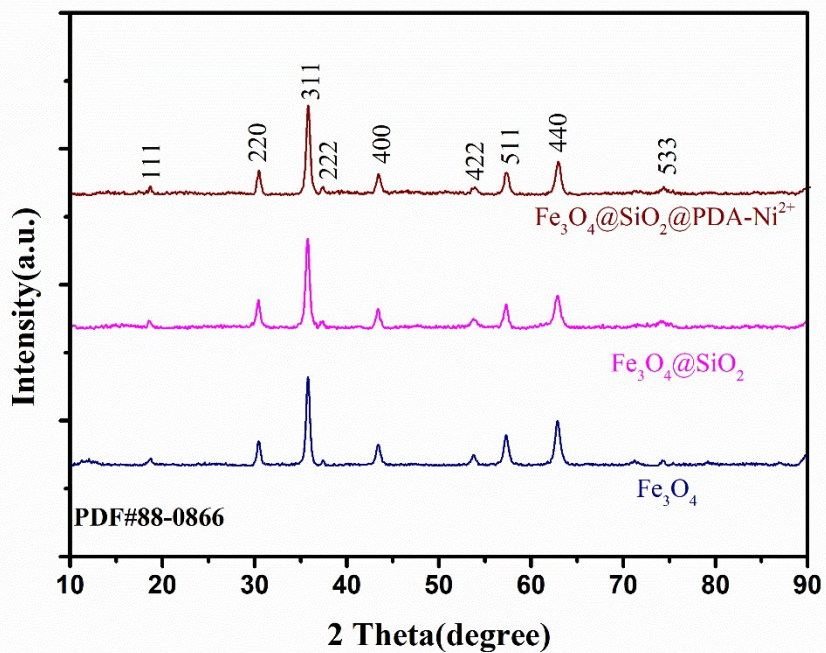

Figure S2. XRD patterns of  $\text{Fe}_3\text{O}_4$ ,  $\text{Fe}_3\text{O}_4@\text{SiO}_2$  and  $\text{Fe}_3\text{O}_4@\text{SiO}_2@\text{PDA-Ni}^{2+}$

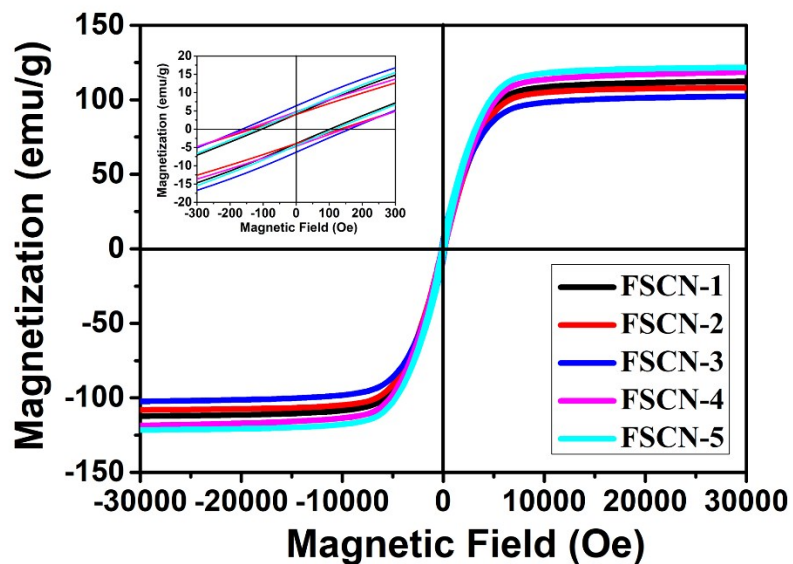

Figure S3. Hysteresis loops of FSCN series measured at 300K, The inset gives an enlarged view of the hysteresis loops (-300 to 300 Oe).

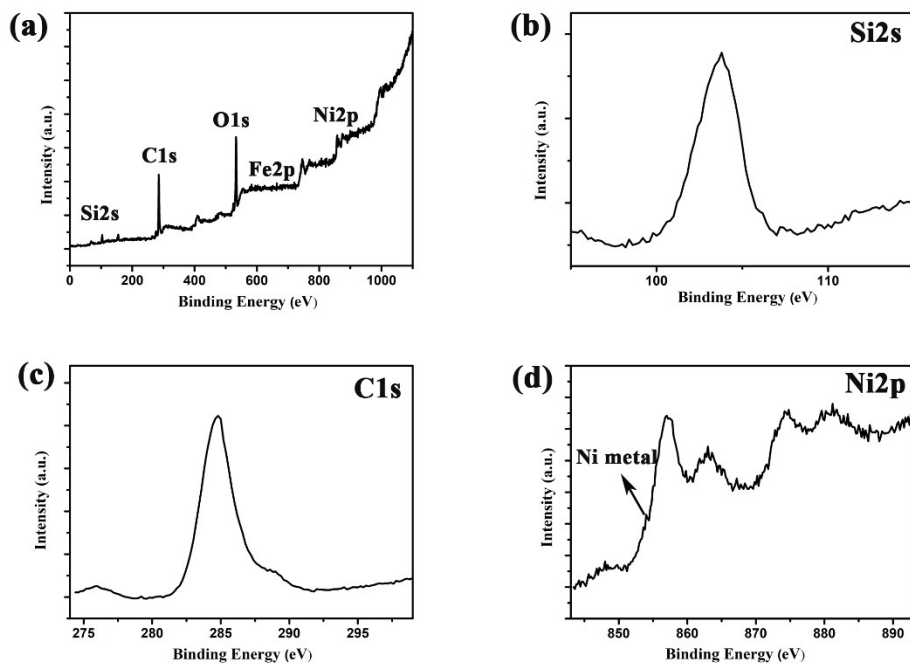

Figure S4. XPS spectra of Fe@SiO<sub>2</sub>@C-Ni microsphere.

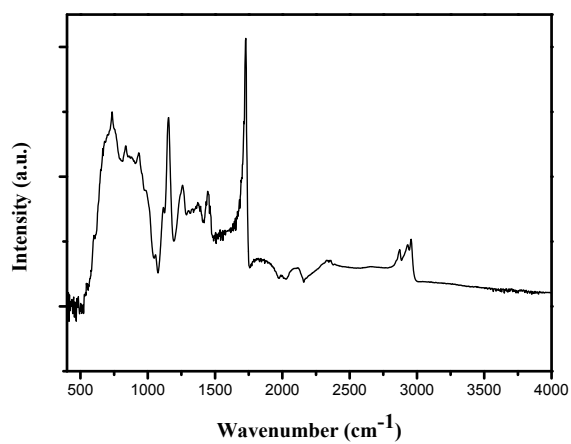

Figure S5. FTIR spectrum of Fe@SiO<sub>2</sub>@C-Ni microsphere.

Table S1 MA performance of traditional absorbers in previous references and this work

| Sample                                           | Optimal RL (dB) | Frequency range<br>(GHz) (RL < -10dB) | References |
|--------------------------------------------------|-----------------|---------------------------------------|------------|
| Fe <sub>3</sub> O <sub>4</sub> @SnO <sub>2</sub> | -22.6           | 10.0-12.2                             | 1          |

|                                                          |        |             |        |
|----------------------------------------------------------|--------|-------------|--------|
| Fe <sub>3</sub> O <sub>4</sub> @TiO <sub>2</sub>         | -33.4  | 4.3-12.1    | 2      |
| Fe <sub>3</sub> O <sub>4</sub> @C                        | -20.6  | 11.8-15.6   | 3      |
| FeCo/C/BaTiO <sub>3</sub>                                | -41.7  | 9.4-14.5    | 4      |
| γ-Fe <sub>2</sub> O <sub>3</sub> @ C@ α-MnO <sub>2</sub> | -41.7  | 7.48-16.66  | 5      |
| CoNi@SiO <sub>2</sub> @TiO <sub>2</sub>                  | -58.2  | 7.7-13.2    | 6      |
| Fe <sub>3</sub> O <sub>4</sub> @MnO <sub>2</sub>         | -48.5  | 7.4-13.8    | 7      |
| NiO@graphene                                             | -59.6  | 12.84-16.72 | 8      |
| CoNi@ SiO <sub>2</sub> @C                                | -46.0  | 7.1-12.7    | 9      |
| Fe <sub>3</sub> O <sub>4</sub> @SiO <sub>2</sub> @RGO    | -26.6  | 8.4-11.8    | 10     |
| Co/CNTs                                                  | -49.16 | 12.4-16.6   | 11     |
| Fe <sub>3</sub> O <sub>4</sub> /PANI                     | -24.3  | 11.04-15.68 | 12     |
| Fe <sub>3</sub> O <sub>4</sub> @ppy                      | -31.5  | 12.8-18     | 13     |
| CoNi@C                                                   | -25    | 12-18       | 14     |
| NiO @SiO <sub>2</sub> @graphene                          | -43.8  | 9.2-15      | 15     |
| This work                                                | -45.5  | 9.8-18      | herein |

1. Y.-J. Chen, P. Gao, R.-X. Wang, C.-L. Zhu, L.-J. Wang, M.-S. Cao and H.-B. Jin, *The Journal of Physical Chemistry C*, 2009, **113**, 10061-10064.
2. J. Liu, J. Xu, R. Che, H. Chen, M. Liu and Z. Liu, *Chemistry—A European Journal*, 2013, **19**, 6746-6752.
3. Y. Du, W. Liu, R. Qiang, Y. Wang, X. Han, J. Ma and P. Xu, *ACS applied materials & interfaces*, 2014, **6**, 12997-13006.
4. J. Jiang, D. Li, D. Geng, J. An, J. He, W. Liu and Z. Zhang, *Nanoscale*, 2014, **6**, 3967-3971.
5. W. You, H. Bi, W. She, Y. Zhang and R. Che, *Small*, 2017, **13**, 1602779.
6. Q. Liu, Q. Cao, H. Bi, C. Liang, K. Yuan, W. She, Y. Yang and R. Che, *Advanced Materials*, 2016, **28**, 486-490.
7. M. Qiao, X. Lei, Y. Ma, L. Tian, K. Su and Q. Zhang, *Chemical Engineering Journal*, 2016, **304**, 552-562.
8. L. Wang, H. Xing, S. Gao, X. Ji and Z. Shen, *Journal of Materials Chemistry C*, 2017, **5**, 2005-2014.

9. S. Zhou, Y. Huang, X. Liu, J. Yan and X. Feng, *Industrial & Engineering Chemistry Research*, 2018, **57**, 5507-5516.
10. Y.-F. Pan, G.-S. Wang and Y.-H. Yue, *RSC Advances*, 2015, **5**, 71718-71723.
11. X. Xiao, Z. Tan, W. Tian, Y. Guo, H. Wang, J. Fu and X. Jian, *Composites Part B: Engineering*, 2018, **152**, 316-323.
12. J. Hou, L. Zhang, H. Qiu, W. Duan, X. Wang, X. Wan and X. Du, *Journal of Materials Science: Materials in Electronics*, 2017, **28**, 9279-9288.
13. M.Qiao, x. Lei, Y. Ma, L. Tian, K. Su and Q. Zhang, *Industrial & Engineering Chemistry Research*, 2016, **55**, 6263-6275.
14. H. Wang, Y. Dai, W. Gong, D. Geng, S. Ma, D. Li, W. Liu and Z. Zhang, *Applied Physics Letters*, 2013, **102**, 223113.
15. L. Wang, Y. Huang, X. Ding, P. Liu and M. Zong, *RSC Advances*, 2013, **3**, 23290-23295.
